# Supplementary material for: Millimeter-sized PbI2 flakes and Pb5S2I6 nanowires for flexible photodetectors
Source: Royal Society of Chemistry journal article supplement (doi:10.1039/c8tc01657g), 2018-01-01
Supplement: c8tc01657g1.pdf [file c8tc01657g1.pdf]

## Supporting Information

# Millimeter-Sized $\text{PbI}_2$ Flakes and $\text{Pb}_5\text{S}_2\text{I}_6$ Nanowires for Flexible Photodetectors

Lin Sun,<sup>a</sup> Chunrui Wang,<sup>\*a</sup> Liu Xu,<sup>a</sup> Jiale Wang,<sup>a</sup> Xiaoshuang Chen,<sup>ab</sup> and Gyu-Chul Yi<sup>c</sup>

<sup>a</sup> Department of Applied Physics and State Key Laboratory for Modification of Chemical Fibers and Polymer Materials, Donghua University, 2999 Renmin Rd North, Songjiang District, Shanghai 201620, P. R. China. E-mail: crwang@dhu.edu.cn.

<sup>b</sup> National Laboratory for Infrared Physics, Shanghai Institute of Technical Physics, Chinese Academy of Science, Shanghai 200083, P. R. China. E-mail: xschen@mail.istp.ac.cn.

<sup>c</sup> Department of Physics and Research Institute of Advanced Materials, Seoul National University, 1 Gwanak-ro, Seoul, Korea. E-mail: gcyi@snu.ac.kr.

## Corresponding Author

\* E-mail: crwang@dhu.edu.cn (C. R. Wang).

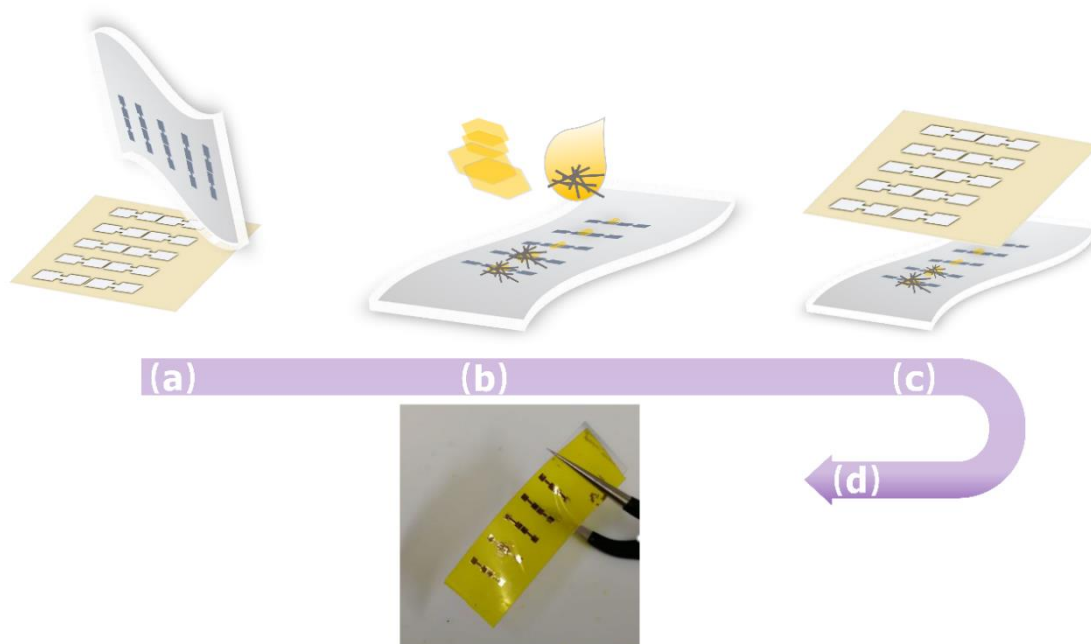

**Fig. S1** Preparation process of  $\text{PbI}_2$  flakes and  $\text{Pb}_5\text{S}_2\text{I}_6$  NWs flexible device. (a) Flexible PI substrate tape pasted on metal mask and leave a pattern; (b) Free-standing flake or NWs (contains ethanol liquid drop) placed to flexible PI tape according to the previous pattern; (c) Metal shadow mask was covered on the surface of flexible PI substrate, then 10 nm Cr and 50 nm Au were sputtered, respectively; (d) The resulting flake-based flexible device.

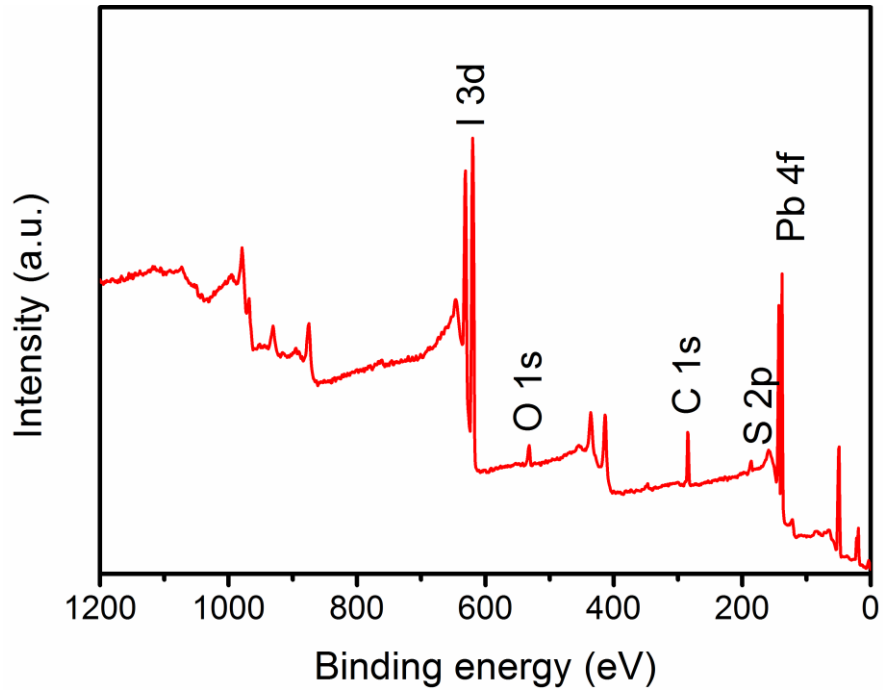

**Fig. S2** XPS analysis of  $\text{Pb}_5\text{S}_2\text{I}_6$  NWs.

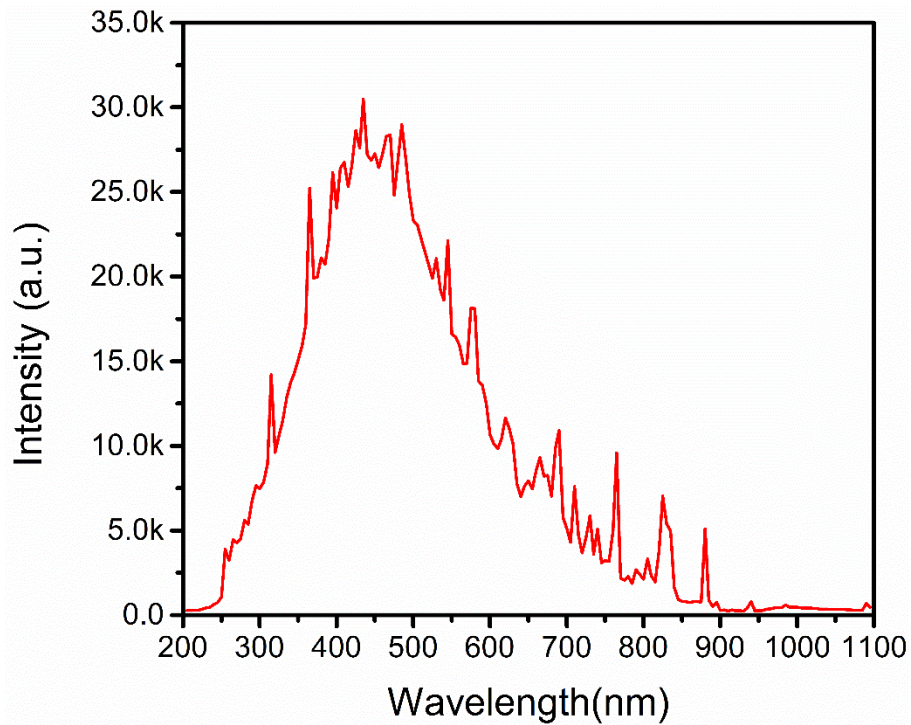

**Fig. S3** Spectral output intensity distribution of Xenon lamp.
